# Supplementary material for: Predictive value of prebronchodilator and postbronchodilator spirometry for COPD features and outcomes
Source: PubMed Central journal article supplement — BMJ Open Respir Res. 2017 Dec 18;4(1):e000213. doi: 10.1136/bmjresp-2017-000213 (PMC5759707; doi:10.1136/bmjresp-2017-000213), 2017-12-18
Supplement: bmjresp-2017-000213supp001.pdf [file bmjresp-2017-000213supp001.pdf]

**Supplemental Table 1.** Prevalence rate of airflow obstruction using pre- vs post-bronchodilator FEV1/FVC<0.7.

|                | PREO         | PREN         | Total        |
|----------------|--------------|--------------|--------------|
| POSTO          | 4150 (41.5%) | 301 (3%)     | 4451 (44.5%) |
| POSTN          | 866 (8.7%)   | 4683 (46.8%) | 5549 (55.5%) |
| Total          | 5016 (50.2%) | 4984 (49.8%) | 10000 (100%) |
| P value <0.001 |              |              |              |

The McNemar test was used to compare the prevalence rate of airflow obstruction using pre-bronchodilator FEV1/FVC<0.7 vs post-bronchodilator FEV1/FVC<0.7.

PREO= pre-bronchodilator FEV1/FVC<0.7

PREN= pre-bronchodilator FEV1/FVC≥0.7

POSTO= post-bronchodilator FEV1/FVC<0.7

POSTN= post-bronchodilator FEV1/FVC≥0.7

**Supplemental Table 2.** Multivariable linear regression models for subjects with airflow discordance in pre- and post-bronchodilator spirometry (PREN-POSTO versus PREO-POSTN subjects).

| <b>Models included demographics, smoking and comorbidities</b>                                          |                          |                |            |
|---------------------------------------------------------------------------------------------------------|--------------------------|----------------|------------|
|                                                                                                         | <b>Coef (95%CI)</b>      | <b>P value</b> | <b>AIC</b> |
| <b>MMRCD</b>                                                                                            | 0.19 (0.03, 0.34)        | 0.019          | 390        |
| <b>SGRQ</b>                                                                                             | 3.55 (1.27, 5.82)        | 0.002          | 6660       |
| <b>6-MWD, feet</b>                                                                                      | -61.01 (-105.96, -17.06) | 0.007          | 13388      |
| <b>Models included demographics, smoking and comorbidities and post-bronchodilator FEV1 % predicted</b> |                          |                |            |
|                                                                                                         | <b>Coef (95%CI)</b>      | <b>P value</b> | <b>AIC</b> |
| <b>MMRCD</b>                                                                                            | 0.07 (-0.08, 0.22)       | 0.37           | 324        |
| <b>SGRQ</b>                                                                                             | 1.7 (-0.54, 3.93)        | 0.14           | 6581       |
| <b>6-MWD, feet</b>                                                                                      | -18.53 (-61.06, 24)      | 0.39           | 13275      |

All regression models included the following co-variates: age, sex, race, smoking status, pack per years, history (per questionnaire) of asthma, diabetes, high blood pressure, stroke and sleep apnea.

AIC = Akaike information criterion; MMRC = modified Medical Research Council dyspnea score; SGRQ = St. George's Respiratory Questionnaire score; 6-MWD = 6-min walk distance; 95%CI= 95% confidence interval.

PREO-POSTN = pre-bronchodilator FEV1/FVC<0.7 and post-bronchodilator FEV1/FVC>0.7

PREN-POSTO = pre-bronchodilator FEV1/FVC>0.7 and post-bronchodilator FEV1/FVC<0.7

**Supplemental Table 3.** Multivariable linear regression models for subjects with airflow discordance in pre- and post-bronchodilator spirometry (PREN-POSTO versus PREO-POSTN subjects).

| <b>Models included demographics, smoking and comorbidities</b>                                          |                     |                |            |
|---------------------------------------------------------------------------------------------------------|---------------------|----------------|------------|
|                                                                                                         | <b>Coef (95%CI)</b> | <b>P value</b> | <b>AIC</b> |
| <b>Change in FEV1, ml</b>                                                                               | 70.6(13.8, 127.3)   | 0.015          | 6249       |
| <b>Change in 6-MWD, feet</b>                                                                            | -23.5(-85.3, 38.3)  | 0.46           | 6343       |
| <b>Models included demographics, smoking and comorbidities and post-bronchodilator FEV1 % predicted</b> |                     |                |            |
|                                                                                                         | <b>Coef (95%CI)</b> | <b>P value</b> | <b>AIC</b> |
| <b>Change in FEV1, ml</b>                                                                               | 37.5 (-18, 92.9)    | 0.19           | 6208       |
| <b>Change in 6-MWD, feet</b>                                                                            | -22.7 (-85.5, 40.1) | 0.48           | 6345       |

All regression models included the following co-variates: age, sex, race, smoking status, pack per years, history (per questionnaire) of asthma, diabetes, high blood pressure, stroke and sleep apnea.

AIC = Akaike information criterion; 6-MWD = 6-min walk distance; 95%CI= 95% confidence interval.

PREO-POSTN = pre-bronchodilator FEV1/FVC<0.7 and post-bronchodilator FEV1/FVC>0.7

PREN-POSTO = pre-bronchodilator FEV1/FVC>0.7 and post-bronchodilator FEV1/FVC<0.7

**Supplemental Table 4.** Spirometric pattern at Phase 2 visit of subjects with PREO\_POSTN and PREN\_POSTO at baseline.

|                |                   | <b>PREO-POSTN</b> |  | <b>PREN-POSTO</b> |
|----------------|-------------------|-------------------|--|-------------------|
| <b>Phase 2</b> | <b>PREO-POSTO</b> | 44.3% (167)       |  | 49.4% (82)        |
|                | <b>PREN-POSTN</b> | 31.8% (120)       |  | 30.7% (51)        |
|                | <b>PREO-POSTN</b> | 19.1% (72)        |  | 14.5% (24)        |
|                | <b>PREN-POSTO</b> | 4.8% (18)         |  | 5.4% (9)          |
|                | <b>Total</b>      | 100% (377)        |  | 100% (166)        |

PREN-POSTN = pre-bronchodilator FEV1/FVC>0.7 and post-bronchodilator FEV1/FVC>0.7

PREO-POSTNO = pre-bronchodilator FEV1/FVC<0.7 and post-bronchodilator FEV1/FVC<0.7

PREO-POSTN = pre-bronchodilator FEV1/FVC<0.7 and post-bronchodilator FEV1/FVC>0.7

PREN-POSTO = pre-bronchodilator FEV1/FVC>0.7 and post-bronchodilator FEV1/FVC<0.7

**Supplemental table 5.** Association of the various spirometric patterns with mortality.

|                   | <b>HR (95%CI)</b> | <b>P value</b> |
|-------------------|-------------------|----------------|
| <b>PREN-POSTN</b> | -                 | -              |
| <b>PREO-POSTO</b> | 2.81 (2.34, 3.38) | < 0.001        |
| <b>PREO-POSTN</b> | 1.32 (0.94, 1.84) | 0.11           |
| <b>PREN-POSTO</b> | 1.34 (0.85, 2.11) | 0.2            |

All regression models included the following co-variates: age, sex, race, smoking status, pack per years, history (per questionnaire) of asthma, diabetes, high blood pressure, stroke and sleep apnea.

AIC = Akaike information criterion; HR = Hazard ratio.

PREN-POSTN = pre-bronchodilator FEV1/FVC>0.7 and post-bronchodilator FEV1/FVC>0.7

PREO-POSTNO = pre-bronchodilator FEV1/FVC<0.7 and post-bronchodilator FEV1/FVC<0.7

PREO-POSTN = pre-bronchodilator FEV1/FVC<0.7 and post-bronchodilator FEV1/FVC>0.7

PREN-POSTO = pre-bronchodilator FEV1/FVC>0.7 and post-bronchodilator FEV1/FVC<0.7
